# Supplementary material for: Upconversion nanoparticle–Ag@C@Ag composite films for rapid temperature sensing
Source: Royal Society of Chemistry journal article supplement (doi:10.1039/d0ce01873b), 2021-01-01
Supplement: d0ce01873b1.pdf [file d0ce01873b1.pdf]

## Supporting Information

### Upconversion nanoparticles-Ag@C@Ag composite film for rapid temperature sensing

Hu Huang,<sup>a</sup> Lingqiong Wu,<sup>a</sup> Shengbin Cheng,<sup>a</sup> Xiaofeng Wu,<sup>\*b</sup> Shiping Zhan<sup>a</sup> and Yunxin Liu<sup>\*a,b</sup>

<sup>a</sup> Department of Physics and Electronic Science, Hunan University of Science and Technology, Xiangtan, 411201, China.

<sup>b</sup> Department of Computer and Information Engineering, Hunan University of Technology and Business, Changsha, 410205, China.

\* Correspondence authors: E-mail: X.F. Wu: xfwuvip@126.com; Y.X. Liu: lyunxin@163.com

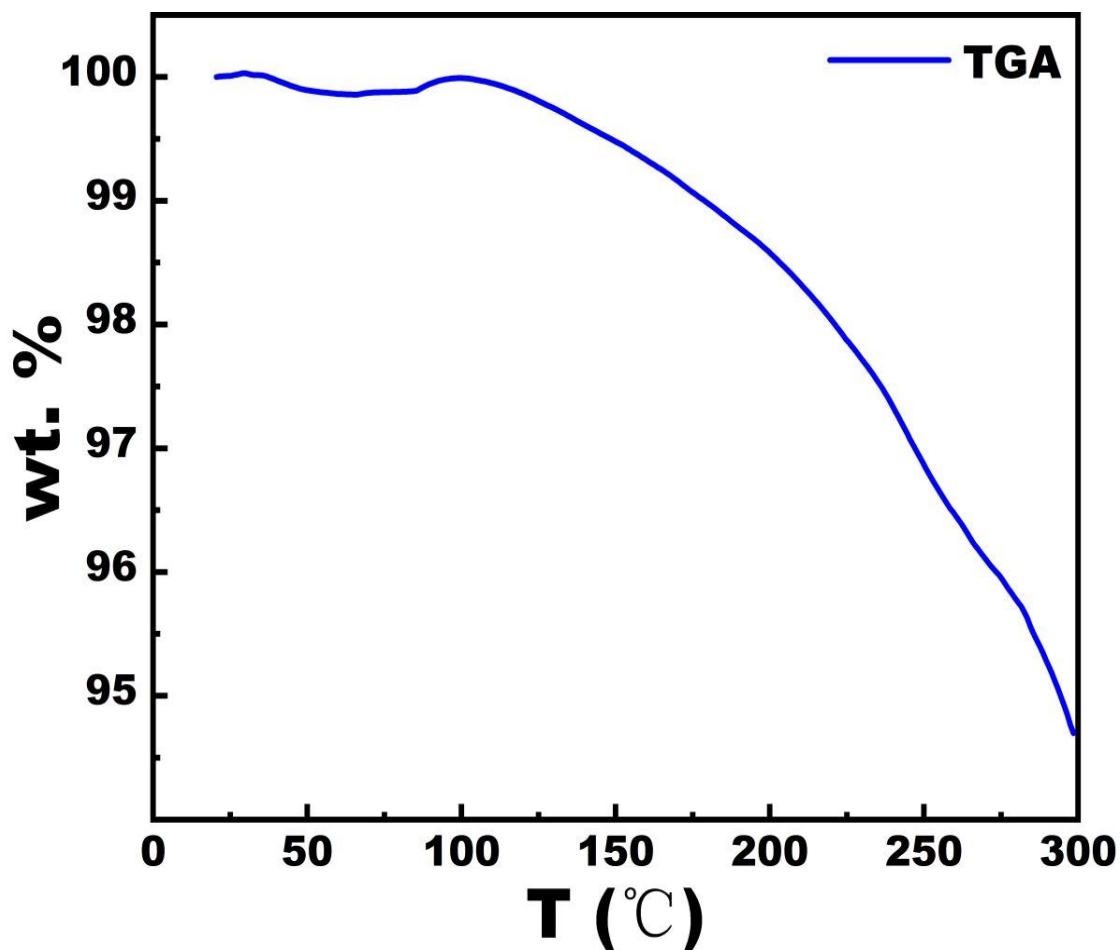

Fig. S1. Thermal Gravity Analysis (TGA) of Ag@C@Ag, the measurement temperature range is from room temperature to 300 °C, and the heating rate is 10 °C·min<sup>-1</sup>

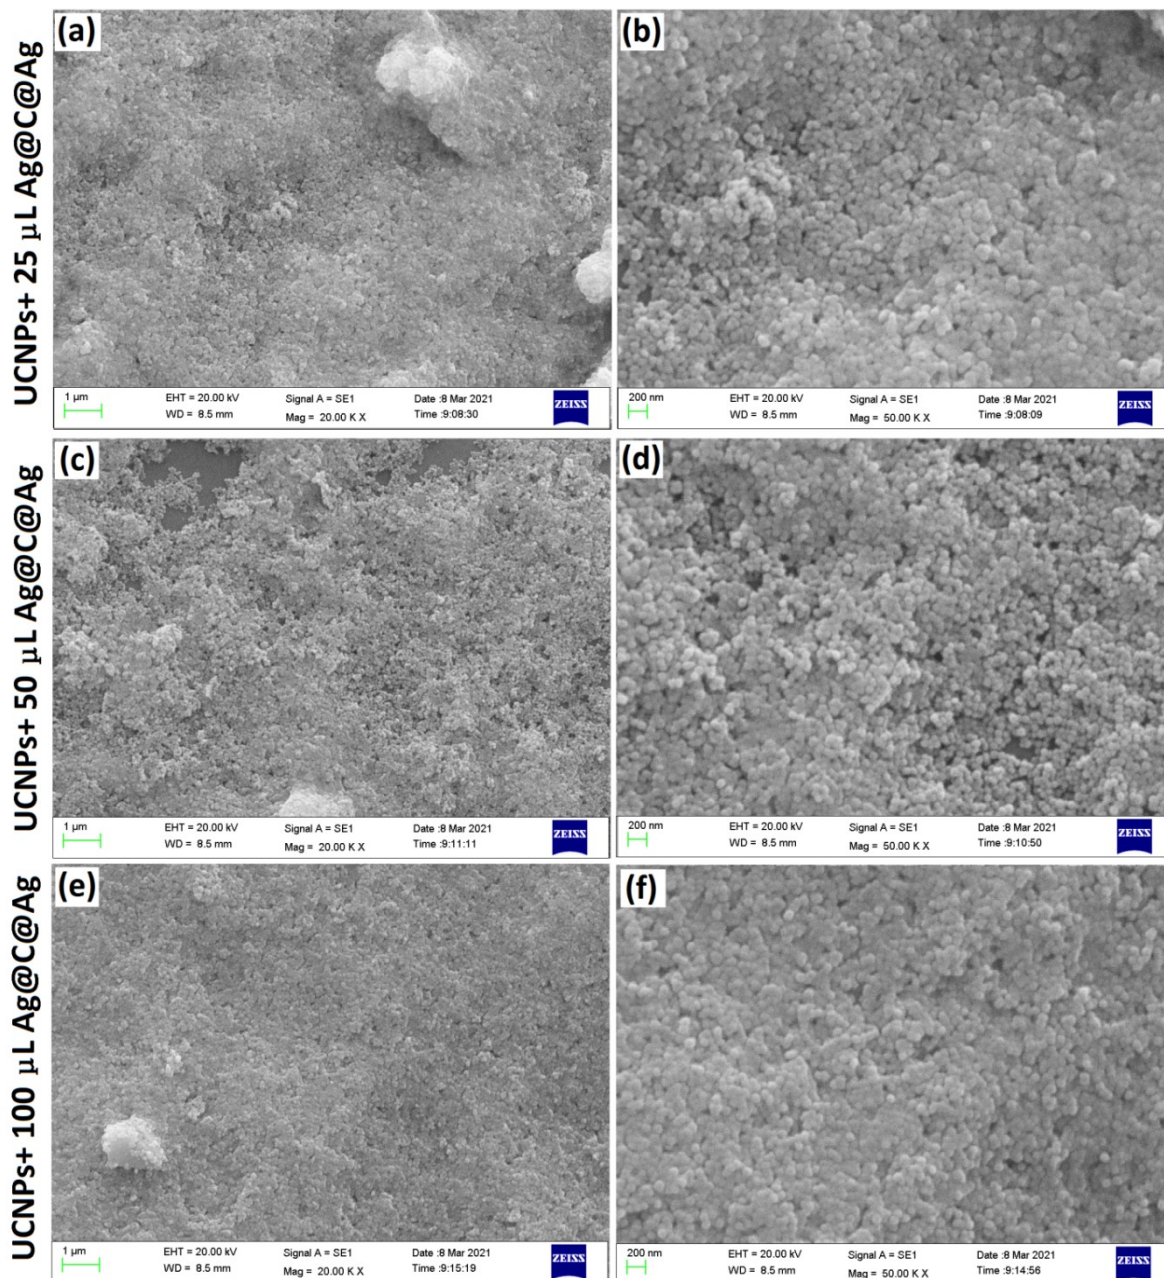

Fig. S2. SEM images of the composite film with different weight ratios of UCNPs to Ag@C@Ag NPs: (a,b) 1:0.25, (c,d) 1:0.5, (e,f) 1:1. (Notes: The volume of UCNPs solution is fixed as 100  $\mu$ L; UCNPs and Ag@C@Ag NPs have the same concentration of 2 mg·mL<sup>-1</sup>)
